# Supplementary figures and images for: A TRPC3/6 Channel Inhibitor Promotes Arteriogenesis after Hind-Limb Ischemia
Source: MDPI journal article supplement (doi:10.3390/cells11132041), 2022-06-27

Figure 6B

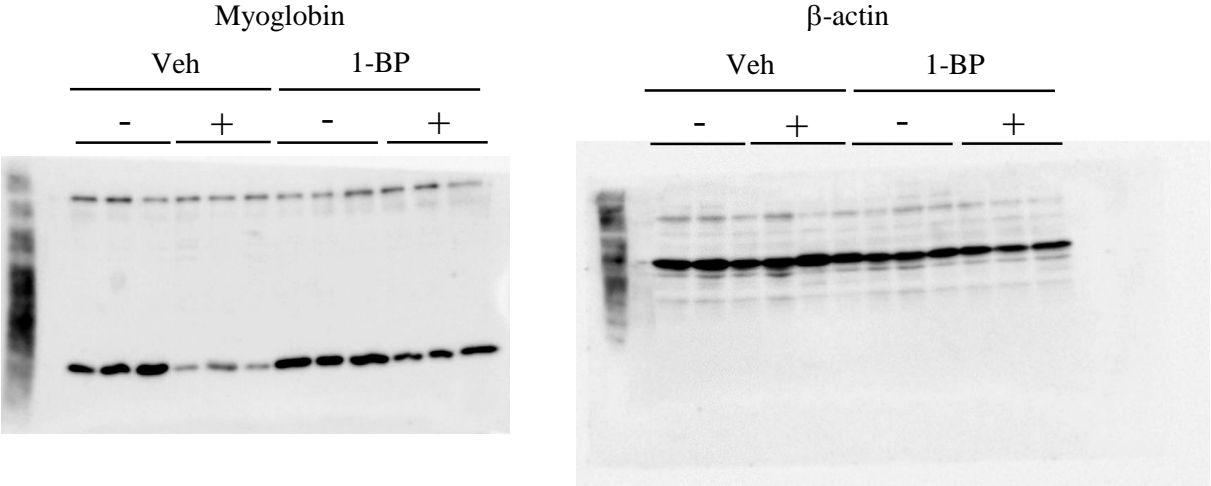

Figure 6F

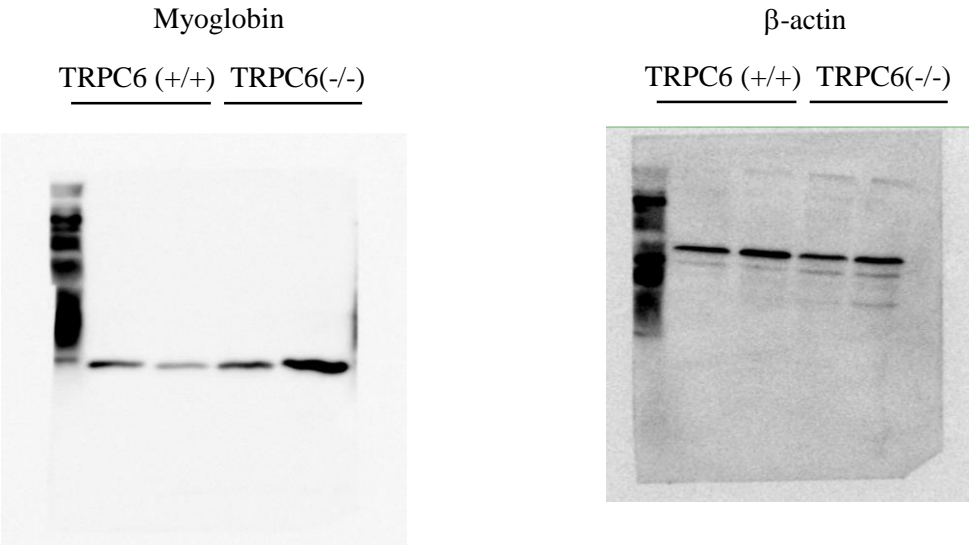

Figure 6I

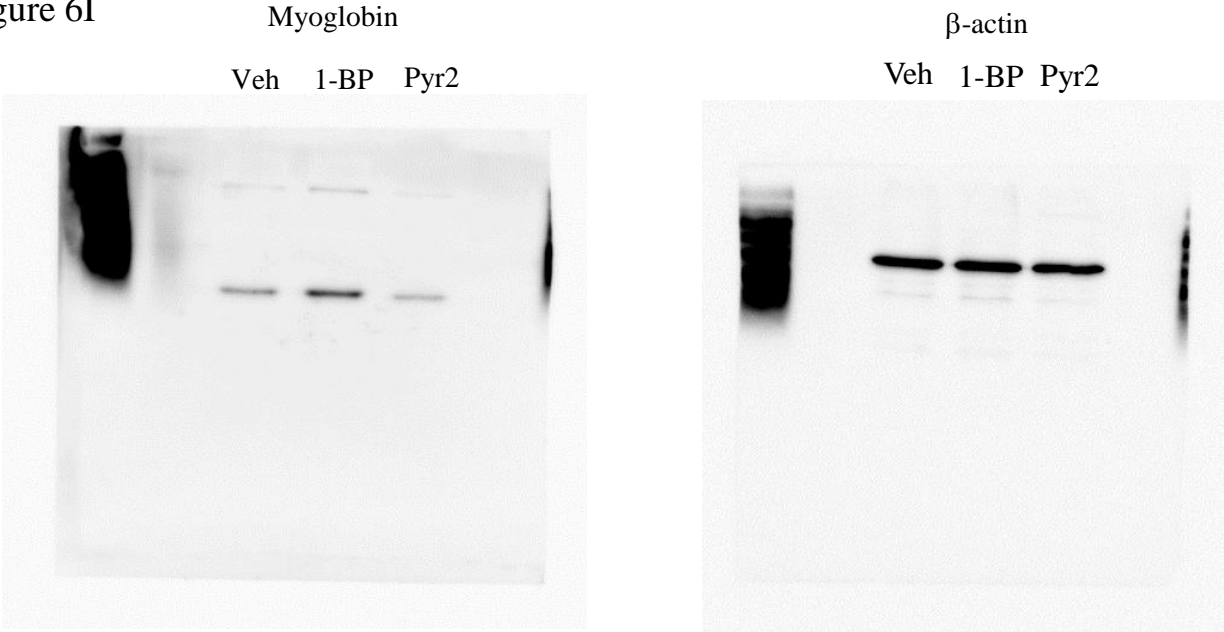

Supplement: s1 [file s1]
